# Supplementary material for: Smoking and Risk for Diabetes Incidence and Mortality in Korean Men and Women
Source: PubMed Central journal article supplement — Diabetes Care. 2010 Sep 7;33(12):2567–72. doi: 10.2337/dc10-0261 (PMC2992192; doi:10.2337/dc10-0261), 2010-09-07
Supplement: supp_dc10-0261_dc100261onlineappendix.pdf [file supp_dc10-0261_dc100261onlineappendix.pdf]

**Supplemental Table 1.** Joint effect of baseline duration of smoking and amount smoked\* among current male smokers<sup>†</sup> in the Korean Cancer Prevention Study, 1992 – 2006<sup>‡</sup>

| Amount smoked,<br>cigarettes per day | Duration of smoking,<br>year | Incident diabetes  |                         | Death from diabetes |
|--------------------------------------|------------------------------|--------------------|-------------------------|---------------------|
|                                      |                              | Outpatient visits  | Hospitalization records |                     |
| 1 – 9                                | 1 – 19                       | 1.0                | 1.0                     | 1.0                 |
|                                      | 20 – 29                      | 1.06 (1.00 – 1.12) | 1.02 (0.87– 1.20)       | 0.85 (0.48 – 1.48)  |
|                                      | ≥ 30                         | 1.11 (1.04 – 1.14) | 1.06 (0.90– 1.26)       | 0.82 (0.51 – 1.31)  |
| 10 – 19                              | 1 – 19                       | 1.09 (1.04 – 1.14) | 1.10 (0.97– 1.26)       | 0.73 (0.39 – 1.35)  |
|                                      | 20 – 29                      | 1.15 (1.10 – 1.20) | 1.07 (0.93– 1.23)       | 0.78 (0.47 – 1.31)  |
|                                      | ≥ 30                         | 1.13 (1.07 – 1.19) | 1.12 (0.96– 1.30)       | 0.72 (0.46 – 1.14)  |
| ≥ 20                                 | 1 – 19                       | 1.27 (1.21 – 1.34) | 1.21 (1.05 – 1.40)      | 1.13 (0.58 – 2.19)  |
|                                      | 20 – 29                      | 1.28 (1.23 – 1.34) | 1.18 (1.03 – 1.36)      | 0.63 (0.35 – 1.14)  |
|                                      | ≥ 30                         | 1.23 (1.16 – 1.30) | 1.28 (1.10 – 1.49)      | 0.81 (0.51 – 1.30)  |

\*Adjusted for age, age<sup>2</sup>, alcohol drinking, body mass index, and exercise

<sup>†</sup>Male participants with information on both duration of smoking and amount smoked at baseline (N=401,904)

<sup>‡</sup>Data collection periods for outpatient visits, hospitalization, and death were 1997 through 2006, 1993 through 2006, and 1993 through 2006, respectively
